# Supplementary material for: Polyoxometalate-Decorated Gold Nanoparticles Inhibit β-Amyloid Aggregation and Cross the Blood–Brain Barrier in a µphysiological Model
Source: MDPI journal article supplement (doi:10.3390/nano13192697), 2023-10-03
Supplement: s1 [file s1]

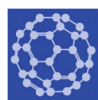

## Supplementary Materials

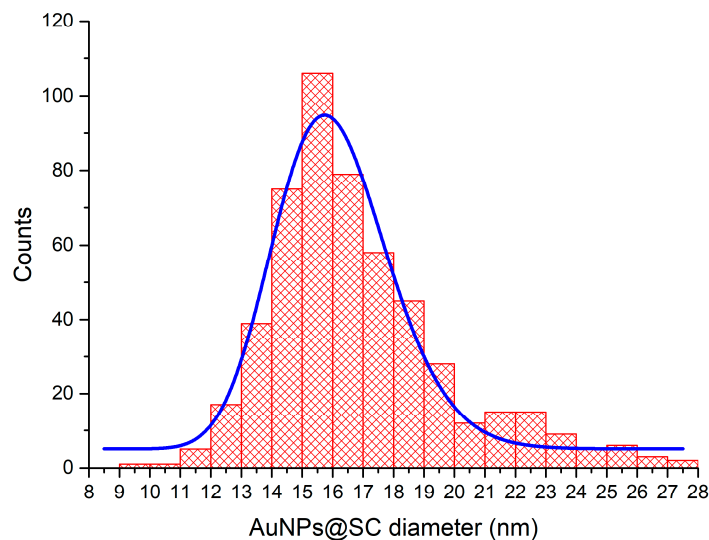

**Figure S1.** Histogram of citrate capped gold nanoparticles (AuNPs@SC), fitted to a LogNormal distribution with the following parameters: Center = 15.95 nm, offset = 5,06 and log standard deviation = 0.11 nm. The size distribution was obtained by measuring the size of  $n = 522$  particles from three different synthesis batches in Bright Field Scanning Transmission Electron Microscopy (BF-STEM) images.

**Table S1.** IR peaks of different compounds synthesized compared in the last two columns with the literature.

| AuNPs@POM | AuNPs@POM@PEG | POM   | POM <sup>1,2</sup> | PEG <sup>3</sup> |
|-----------|---------------|-------|--------------------|------------------|
|           | 1350.2        |       |                    | 1343             |
|           | 1298.1        |       |                    | 1279             |
|           | 1249.9        |       |                    | 1240             |
|           | 1137.5        |       |                    | 1130             |
|           | 1095.6        |       |                    | 1094             |
| 987.6     | 987.6         | 989,5 | 988                |                  |
| 943.2     | 941.3         | 943,2 | 945                | 951              |
| 869.9     | 868.0         | 872,9 | 875                |                  |
| 858.3     | 852.5         | 852,5 | 855                | 840              |
| 798.5     | 796.6         | 790,8 | 805                |                  |
| 731.0     | 727.2         | 713,7 | 730                |                  |
| 513.1     | 509.2         | 505,6 |                    |                  |

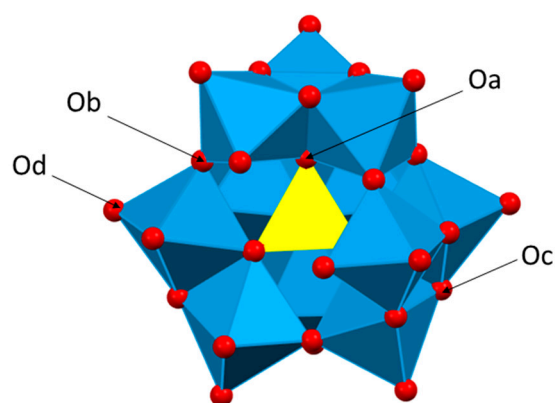

**Scheme 1.** Structure of the  $\beta_2$  isomer of the monolacunary Keggin ion  $[\text{SiW}_{11}\text{O}_{39}]^{8-}$  with labelling of the different oxygen atoms.  $\text{WO}_6$  octahedra (blue) and  $\text{SiO}_4$  tetrahedra (yellow). Adapted from (Chermette and Lefebvre, 2012).<sup>4</sup>

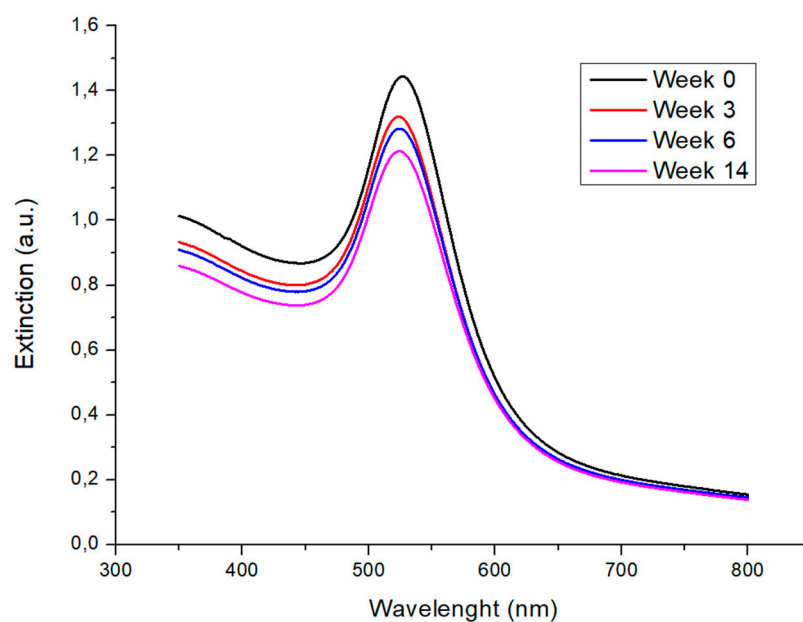

**Figure S2.** Non normalized UV-Vis spectra of AuNPs@POM@PEG in PBS after up to 14 weeks, showing particle long-term stability.

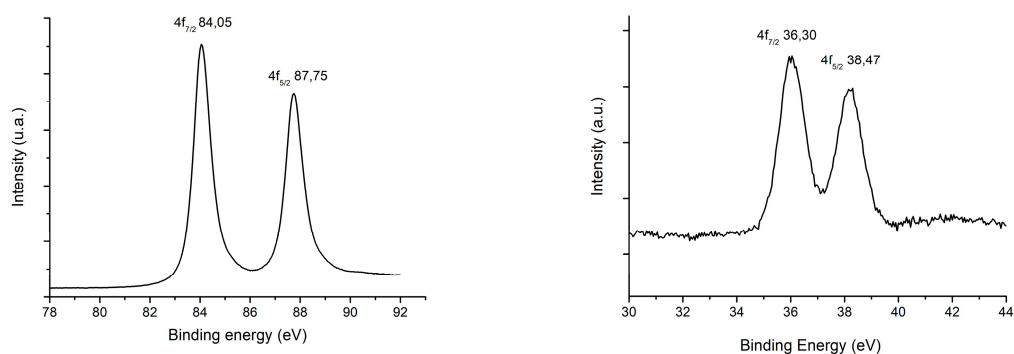

**Figure S3.** XPS spectra of AuNPs@POM. On the left, Au peaks. On the right, W peaks.

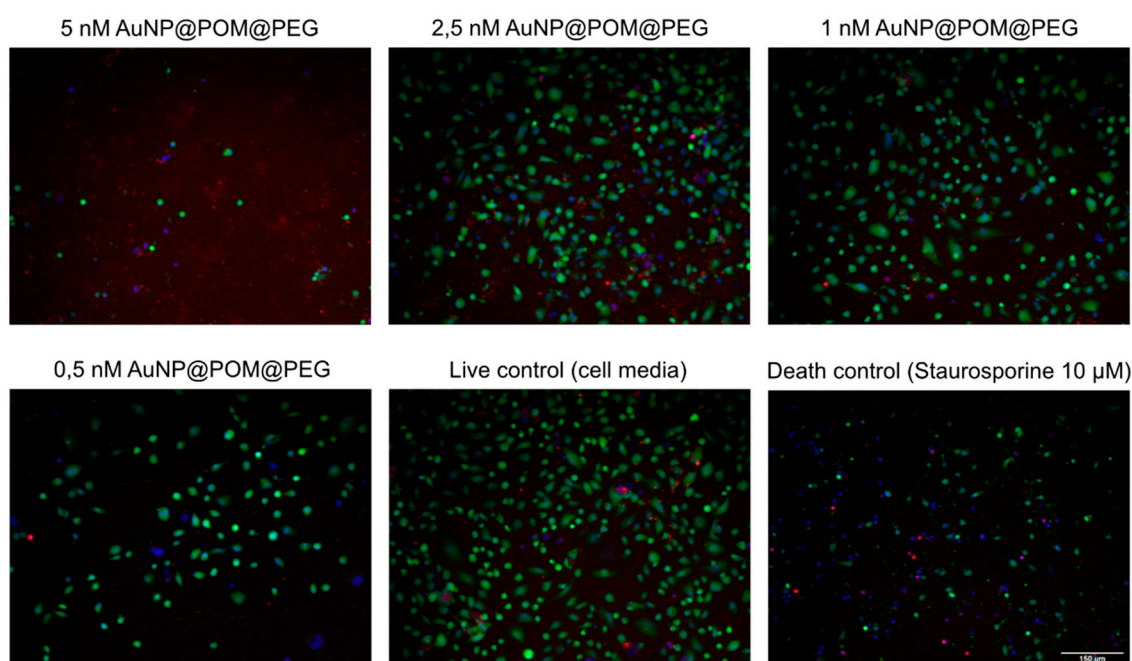

**Figure S4.** Representative fluorescence images of the Live/Dead assay obtained for endothelial cells under different treatment conditions. Green, red and blue signal indicate alive, death cells and cell nuclei, respectively.

## References

1. A. Tézé and G. Hervé, *Journal of Inorganic and Nuclear Chemistry*, 1977, 39, 999–1002.
2. Alvin P. Ginsberg, Ed., *Inorganic Syntheses*, John Wiley & Sons Ltd, New York, 1991.
3. K. Shameli, M. Bin Ahmad, S. D. Jazayeri, S. Sedaghat, P. Shabanzadeh, H. Jahangirian, M. Mahdavi and Y. Abdollahi, *Int J Mol Sci*, 2012, 13, 6639–6650.
4. H. Chermette and F. Lefebvre, *Comptes Rendus Chimie*, 2012, 15, 143–151.
